# Supplementary material for: Protective Effects of Amarogentin against Carbon Tetrachloride-Induced Liver Fibrosis in Mice
Source: Molecules. 2017 May 6;22(5):754. doi: 10.3390/molecules22050754 (PMC6154739; doi:10.3390/molecules22050754)
Supplement: Supplementary file 1 [file molecules-22-00754-s001.pdf]

**Supplementary Table S1.** Effects of amarogentin on survival rates in CCl<sub>4</sub>-treated mice

| Groups           | No.tested | Survivors | %Survivors |
|------------------|-----------|-----------|------------|
| Control          | 8         | 8         | 100        |
| CCl <sub>4</sub> | 8         | 7         | 87.5       |
| Colchicine       | 8         | 8         | 100        |
| AG (25 mg/kg)    | 8         | 7         | 87.5       |
| AG (50 mg/kg)    | 8         | 8         | 100        |
| AG (100 mg/kg)   | 8         | 8         | 100        |

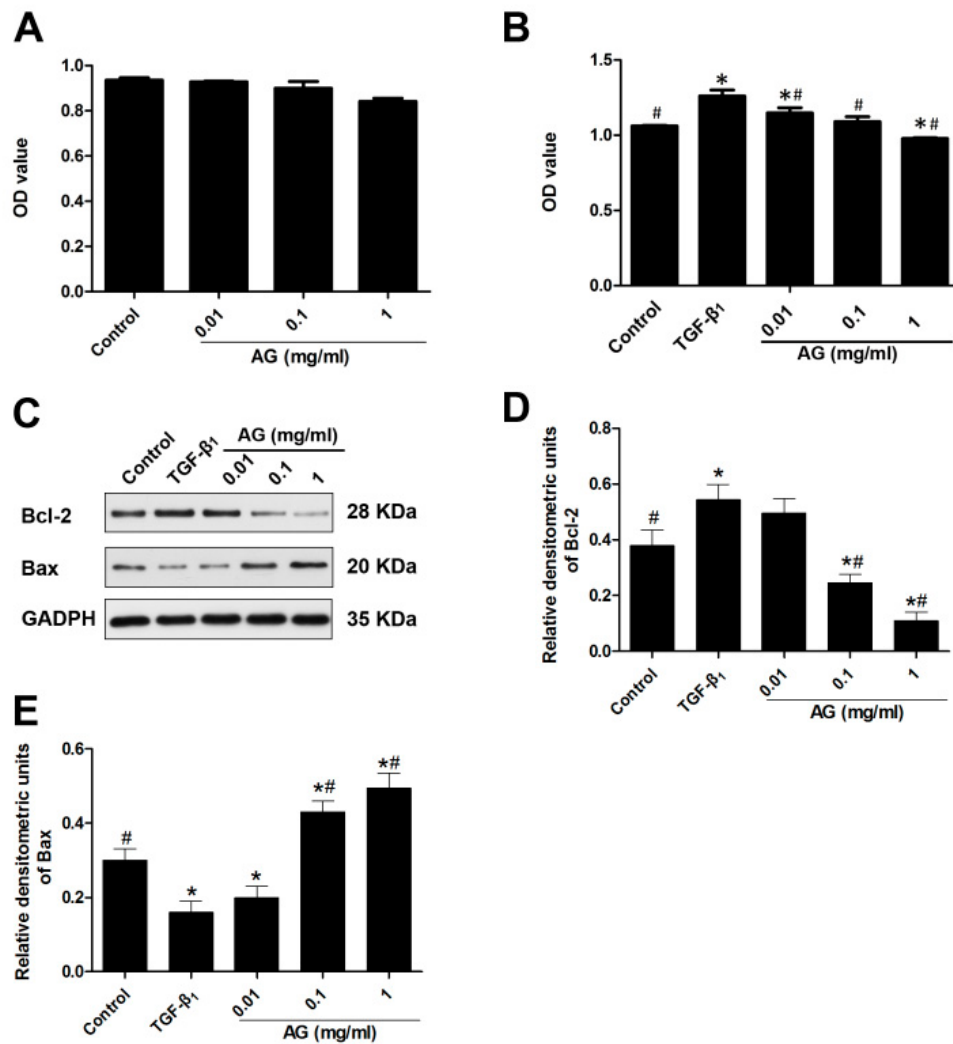

**Supplementary Figure S1.** Effect of amarogentin on HSC proliferation and apoptosis *in vitro*. (A) Effect of AG on HSC proliferation; (B) effect of AG on TGF-β<sub>1</sub>-induced HSC proliferation. (C) immunoblots of the Bcl-2 and Bax protein expression levels in HSC; (D) densitometry analysis of Bcl-2; (E) densitometry analysis of Bax. Values are expressed as the means ± SD (values of three independent experiments) and were analysed using one-way ANOVA with Tukey's multiple comparisons test. \*  $p < 0.05$  versus the control group, #  $p < 0.05$  versus the TGF-β<sub>1</sub> group.
